# Supplementary material for: Validation and Psychometric Properties of the Spanish Version of the Fear of Childbirth Questionnaire (CFQ-e)
Source: MDPI journal article supplement (doi:10.3390/jcm11071843), 2022-03-26
Supplement: s1 [file s1]

|                                                                                                                                 | Profession<br>and Gender | Content<br>Validity Index-<br>Expert (CVI-E) <sup>a</sup> | Profile of the expert                                                                                                                                                                                            |
|---------------------------------------------------------------------------------------------------------------------------------|--------------------------|-----------------------------------------------------------|------------------------------------------------------------------------------------------------------------------------------------------------------------------------------------------------------------------|
| Expert 1                                                                                                                        | Midwife/Female           | 0.82                                                      | Full-time teacher attached to the Multi-professional Teaching Unit of Obstetrics and Gynaecology. Completed her professional studies in England and contributed to the initial translation of the questionnaire. |
| Expert 2                                                                                                                        | Midwife/Female           | 0.77                                                      | PhD. Associate university professor. Conducts her professional activity at the Department of Healthcare Programmes of the Canary Islands Health Service-Women's Services.                                        |
| Expert 3                                                                                                                        | Obstetrician/Female      | 0.75                                                      | Responsible for the Obstetric-Gynaecological-Delivery Unit of the XXXX. Chair of the XXXXX Breastfeeding Committee.                                                                                              |
| Expert 4                                                                                                                        | Midwife/Male             | 0.55                                                      | Midwife with over 20 years of experience, mostly in the United Kingdom. Selected for his knowledge of the population in which the original questionnaire was validated.                                          |
| Expert 5                                                                                                                        | Midwife/Male             | 0.90                                                      | PhD. Associate university professor, working directly in the delivery unit. Doctoral Thesis on childbirth satisfaction and expectations.                                                                         |
| Expert 6                                                                                                                        | Nurse/Male               | 1                                                         | PhD and University Professor. An expert in Research Methodology. Has participated in multiple projects relating to the design, adaptation and validation of Health Science questionnaires.                       |
| Expert 7                                                                                                                        | Nurse/Female             | 0.52                                                      | PhD and full-time associate university professor. Evaluator for the Spanish Ministry of Health's FIS (strategic action in Health). Director of a Scientific Journal indexed in the Scimago Journal Rank (SJR).   |
| Expert 8                                                                                                                        | Obstetrician/Female      | 0.72                                                      | PhD and Professor linked to the University. Head of the Obstetrics and Gynaecology Unit of XXXXX.                                                                                                                |
| Expert 9                                                                                                                        | Midwife/Male             | 0.72                                                      | Healthcare Midwife. PhD candidate with a thesis on Fear of Childbirth.                                                                                                                                           |
| Expert 10                                                                                                                       | Nurse/Female             | 1                                                         | PhD and University Professor. Experienced in research in the field of Psychology. Editor of a Scientific Journal indexed in the Scimago Journal Rank (SJR).                                                      |
| a= Calculated as Number of items that scored 3-4 points with each expert/Number of total items in the questionnaire (40 items). |                          |                                                           |                                                                                                                                                                                                                  |

Supplementary Table S2. Profile of the experts who contributed to the content validation and each expert's CVI
