# Supplementary material for: Validation and Psychometric Properties of the Spanish Version of the Fear of Childbirth Questionnaire (CFQ-e)
Source: MDPI journal article supplement (doi:10.3390/jcm11071843), 2022-03-26
Supplement: s1 [file s1]

| Fear of Childbirth Questionnaire<br>(CFQ)<br>Original model<br>40 items<br>9 subscales |                           |                | Fear of Childbirth Questionnaire Spanish version<br>(CFQ-e)<br>Spanish version after validation<br>37 items<br>4 subscales |                           |                |
|----------------------------------------------------------------------------------------|---------------------------|----------------|----------------------------------------------------------------------------------------------------------------------------|---------------------------|----------------|
|                                                                                        | Cronbach's<br>Coefficient | Omega<br>Index |                                                                                                                            | Cronbach's<br>Coefficient | Omega<br>Index |
| Total                                                                                  | <b>0.951</b>              | <b>0.949</b>   | Total                                                                                                                      | <b>0.947</b>              | <b>0.945</b>   |
| Fear of loss of sexual pleasure<br>/attractiveness (6 items)                           | 0.888                     | 0.890          | Fears relating to sexual aspects and<br>embarrassment<br>(10 items)                                                        | 0.888                     | 0.894          |
| Fear of Pain from a vaginal birth<br>(5 items)                                         | 0.900                     | 0.906          |                                                                                                                            |                           |                |
| Fear of Medical interventions (7<br>items)                                             | 0.789                     | 0.788          | Fear of Medical Interventions<br>(10 items)                                                                                | 0.878                     | 0.878          |
| Fear of Embarrassment (5 items)                                                        | 0.779                     | 0.796          |                                                                                                                            |                           |                |
| Fear of harm to baby (3 items)                                                         | 0.928                     | 0.929          |                                                                                                                            |                           |                |
|                                                                                        |                           |                | Fear of pain<br>(7 items)                                                                                                  | 0.897                     | 0.896          |
| Fear of Caesarean Birth (3 items)                                                      | 0.833                     | 0.833          |                                                                                                                            |                           |                |
| Fear of mom or baby dying (3<br>items)                                                 | 0.799                     | 0.804          | Fear of harm and dying<br>(10 items)                                                                                       | 0.913                     | 0.911          |
| Fear of insufficient pain<br>medication (3 items)                                      | 0.737                     | 0.751          |                                                                                                                            |                           |                |
| Fear of body damage from a<br>vaginal birth (5 items)                                  | 0.831                     | 0.830          |                                                                                                                            |                           |                |

Supplementary Material S10. CFQ-e Reliability scores
