# Supplementary material for: Validation and Psychometric Properties of the Spanish Version of the Fear of Childbirth Questionnaire (CFQ-e)
Source: MDPI journal article supplement (doi:10.3390/jcm11071843), 2022-03-26
Supplement: s1 [file s1]

|        | F1           | F2           | F3           | F4           |
|--------|--------------|--------------|--------------|--------------|
| Item 1 | 0.091        | 0.087        | 0.049        | <b>0.504</b> |
| Item2  | 0.106        | -0.039       | <b>0.305</b> | <b>0.419</b> |
| Item3  | 0.091        | -0.015       | -0.087       | <b>0.669</b> |
| Item4  | 0.173        | <b>0.442</b> | -0.146       | 0.192        |
| Item5  | 0.173        | <b>0.426</b> | -0.083       | 0.059        |
| Item6  | -0.051       | 0.086        | -0.025       | <b>0.880</b> |
| Item7  | <b>0.482</b> | 0.051        | 0.040        | -0.184       |
| Item8  | 0.217        | -0.026       | 0.264        | 0.295        |
| Item9  | 0.037        | -0.023       | -0.080       | <b>0.887</b> |
| Item10 | -0.079       | 0.078        | -0.056       | <b>0.893</b> |
| Item11 | 0.127        | 0.099        | <b>0.307</b> | 0.140        |
| Item12 | <b>0.509</b> | -0.142       | 0.189        | 0.135        |
| Item13 | <b>0.696</b> | -0.180       | 0.024        | 0.230        |
| Item14 | 0.201        | 0.042        | 0.099        | 0.213        |
| Item15 | <b>0.769</b> | -0.010       | -0.023       | -0.122       |
| Item16 | -0.049       | -0.054       | -0.045       | <b>0.894</b> |
| Item17 | 0.023        | 0.198        | 0.129        | <b>0.460</b> |
| Item18 | 0.026        | -0.133       | <b>0.548</b> | <b>0.350</b> |
| Item19 | 0.063        | <b>0.309</b> | <b>0.347</b> | 0.133        |
| Item20 | -0.075       | -0.000       | -0.026       | <b>0.826</b> |
| Item21 | <b>0.515</b> | 0.161        | 0.030        | -0.147       |
| Item22 | 0.130        | <b>0.527</b> | -0.115       | 0.073        |
| Item23 | <b>0.463</b> | <b>0.316</b> | 0.042        | -0.198       |
| Item24 | <b>0.819</b> | -0.018       | 0.049        | -0.074       |
| Item25 | <b>0.543</b> | <b>0.312</b> | -0.098       | -0.141       |
| Item26 | <b>0.693</b> | 0.011        | -0.085       | 0.216        |
| Item27 | <b>0.742</b> | 0.003        | -0.184       | 0.211        |
| Item28 | 0.188        | <b>0.369</b> | 0.280        | -0.014       |
| Item29 | -0.024       | -0.097       | <b>0.669</b> | 0.206        |
| Item30 | -0.041       | -0.050       | <b>0.838</b> | 0.018        |
| Item31 | 0.282        | -0.115       | <b>0.497</b> | -0.013       |
| Item32 | <b>0.517</b> | 0.167        | 0.100        | -0.106       |
| Item33 | -0.025       | <b>0.798</b> | -0.054       | -0.022       |
| Item34 | -0.106       | -0.002       | <b>1.001</b> | -0.096       |
| Item35 | -0.058       | 0.040        | <b>0.950</b> | -0.097       |
| Item36 | -0.108       | <b>0.892</b> | 0.037        | -0.056       |
| Item37 | -0.037       | -0.057       | <b>0.783</b> | -0.088       |
| Item38 | -0.108       | <b>0.467</b> | 0.295        | 0.080        |
| Item39 | -0.185       | <b>0.559</b> | 0.271        | 0.214        |
| Item40 | 0.009        | <b>0.635</b> | 0.049        | 0.095        |

Supplementary Table S5. Factor loadings (after rotation) of the model obtained from 4 factors and 40 items of the first versión of CFQ-E on the first sample (n=279)
