# Supplementary material for: Validation and Psychometric Properties of the Spanish Version of the Fear of Childbirth Questionnaire (CFQ-e)
Source: MDPI journal article supplement (doi:10.3390/jcm11071843), 2022-03-26
Supplement: s1 [file s1]

**Cuestionario de miedo al parto-CFQ-e VERSIÓN PRIMERA. A cumplimentar por la gestante**  
*Gracias por colaborar en este estudio. A continuación se adjunta una serie de situaciones del parto y nacimiento que a algunas mujeres les pueden generar miedo o terror. Para cada una de las situaciones reseñadas, indique cuanto miedo le genera (marque con un cruz o círculo). Use esta escala como guía:*

|                  |                                                         |
|------------------|---------------------------------------------------------|
| Nada en absoluto | 0 No tengo miedo en absoluto de este aspecto del parto. |
| Un poco          | 1 Tengo algo de miedo a este aspecto del parto.         |
| Moderadamente    | 2 Tengo bastante miedo a este aspecto del parto.        |
| Mucho            | 3 Tengo mucho miedo a este aspecto del parto.           |
| Extremadamente   | 4 Tengo un miedo extremo a este aspecto del parto.      |

| SITUACIÓN | MIEDO            |         |               |       |         |
|-----------|------------------|---------|---------------|-------|---------|
|           | Nada en absoluto | Un poco | Moderadamente | Mucho | Extremo |

***Cuanto miedo te genera...***

|                                                                                                         |   |   |   |   |   |
|---------------------------------------------------------------------------------------------------------|---|---|---|---|---|
| 1. Que te hagan daño por una asistencia médica incompetente ?                                           | 0 | 1 | 2 | 3 | 4 |
| 2. Sufrir un desgarro o daño rectal como consecuencia del parto?                                        | 0 | 1 | 2 | 3 | 4 |
| 3. Morir durante el parto?                                                                              | 0 | 1 | 2 | 3 | 4 |
| 4. Recibir anestesia general?                                                                           | 0 | 1 | 2 | 3 | 4 |
| 5. Que te administren inyecciones?                                                                      | 0 | 1 | 2 | 3 | 4 |
| 6. Que dañen o perjudiquen al bebé como consecuencia del parto?                                         | 0 | 1 | 2 | 3 | 4 |
| 7. Que otras personas te vean desnuda durante el parto?                                                 | 0 | 1 | 2 | 3 | 4 |
| 8. Sufrir un desgarro vaginal durante el parto?                                                         | 0 | 1 | 2 | 3 | 4 |
| 9. Que el bebé sufra algún daño durante el parto?                                                       | 0 | 1 | 2 | 3 | 4 |
| 10. Que dañen al bebé en una intervención médica durante el parto (ej. ventosa, anestesia, forceps...)? | 0 | 1 | 2 | 3 | 4 |

|                                                                                                                              |                  |         |               |       |               |
|------------------------------------------------------------------------------------------------------------------------------|------------------|---------|---------------|-------|---------------|
| 11. Que no te hagan una cesárea, cuando es lo que tu prefieres?                                                              | 0                | 1       | 2             | 3     | 4             |
| 12. Que tu vagina se estire por tener un parto vaginal?                                                                      | 0                | 1       | 2             | 3     | 4             |
| 13. Disfrutar menos de las relaciones sexuales por el estiramiento de la vagina a causa del parto vaginal?                   | 0                | 1       | 2             | 3     | 4             |
| <b>SITUACIÓN</b>                                                                                                             | <b>IEDO</b>      |         |               |       |               |
| <i>Cuanto miedo te genera ...</i>                                                                                            | Nada en absoluto | Un poco | Moderadamente | Mucho | Extremo Mucho |
| 14. Perder el control de tus emociones frente a otras personas (ser maleducada, gritar) durante el parto?                    | 0                | 1       | 2             | 3     | 4             |
| 15. Que tu cuerpo sea menos atractivo tras el parto?                                                                         | 0                | 1       | 2             | 3     | 4             |
| 16. Que el bebé se asfixie durante el parto?                                                                                 | 0                | 1       | 2             | 3     | 4             |
| 17. Necesitar un forceps o ventosa?                                                                                          | 0                | 1       | 2             | 3     | 4             |
| 18. No recibir la medicación para el dolor que necesites?                                                                    | 0                | 1       | 2             | 3     | 4             |
| 19. Que te realicen una episiotomía (que te realicen un corte en tu vagina)?                                                 | 0                | 1       | 2             | 3     | 4             |
| 20. Que el bebé se muera durante el parto?                                                                                   | 0                | 1       | 2             | 3     | 4             |
| 21. Que otras personas te vean orinar durante el parto?                                                                      | 0                | 1       | 2             | 3     | 4             |
| 22. Que te administren la epidural?                                                                                          | 0                | 1       | 2             | 3     | 4             |
| 23. Sentirte observada por desconocidos durante el parto?                                                                    | 0                | 1       | 2             | 3     | 4             |
| 24. Que tu vagina se vea menos atractiva tras un parto vaginal?                                                              | 0                | 1       | 2             | 3     | 4             |
| 25. Que te queden cicatrices tras la cesárea?                                                                                | 0                | 1       | 2             | 3     | 4             |
| 26. Disfrutar menos de las relaciones sexuales por sentir dolor o molestias tras                                             | 0                | 1       | 2             | 3     | 4             |
| 27. Que tu pareja disfrute menos de las relaciones sexuales después del parto por el estiramiento de tu vagina tras el parto | 0                | 1       | 2             | 3     | 4             |
| 28. Necesitar puntos de sutura tras el parto?                                                                                | 0                | 1       | 2             | 3     | 4             |
| 29. Que no te pongan la epidural durante el parto en el caso de quererla o necesitarla?                                      | 0                | 1       | 2             | 3     | 4             |
| 30. Sentir dolor durante el parto?                                                                                           | 0                | 1       | 2             | 3     | 4             |

|                                                                          |   |   |   |   |   |
|--------------------------------------------------------------------------|---|---|---|---|---|
| 31. Tener un parto vaginal?                                              | 0 | 1 | 2 | 3 | 4 |
| 32. Que otras personas te vean defecar durante el parto ?                | 0 | 1 | 2 | 3 | 4 |
| 33. No poder tener un parto via vaginal a pesar de ser lo que prefieres? | 0 | 1 | 2 | 3 | 4 |

| SITUACIÓN | MIEDO            |         |               |       |         |
|-----------|------------------|---------|---------------|-------|---------|
|           | Nada en absoluto | Un poco | Moderadamente | Mucho | Extremo |

*Cuanto miedo te genera ...*

|                                                                                       |   |   |   |   |   |
|---------------------------------------------------------------------------------------|---|---|---|---|---|
| 34. Sentir dolor mientras empujas al bebé?                                            | 0 | 1 | 2 | 3 | 4 |
| 35. Sentir dolor durante un parto vía vaginal?                                        | 0 | 1 | 2 | 3 | 4 |
| 36. Tener una cesárea?                                                                | 0 | 1 | 2 | 3 | 4 |
| 37. Sentir dolor durante las contracciones?                                           | 0 | 1 | 2 | 3 | 4 |
| 38. Que te sonden (un tubo que se inserta en la uretra para recoger la orina)?        | 0 | 1 | 2 | 3 | 4 |
| 39. Sentir dolor durante una cesárea?                                                 | 0 | 1 | 2 | 3 | 4 |
| 40. No poder tener el tipo de parto que te gustaría (por ejemplo: vaginal o cesárea)? | 0 | 1 | 2 | 3 | 4 |
| Otros (especifica):_____                                                              | 0 | 1 | 2 | 3 | 4 |

## ESCALA DE INTERFERENCIA

*Algunas veces nuestros miedos pueden afectar en nuestras vidas; por ejemplo en nuestro trabajo, familia u otras cosas que nos gusta hacer. Indique, utilizando la siguiente escala, cuánto afectan sus miedos al parto en tu vida:*

|                        |   |                                                                                                                                         |
|------------------------|---|-----------------------------------------------------------------------------------------------------------------------------------------|
| Ninguna interferencia  | 0 | Mi miedo no interfiere en ningún aspecto de mi vida.                                                                                    |
| Interferencia leve     | 1 | Mi miedo interfiere en mi vida, pero solo en pequeñas cosas.                                                                            |
| Interferencia moderada | 2 | Mi miedo interfiere en algunas actividades que son importantes para mí. Definitivamente mi miedo causa problemas en mi vida.            |
| Interferencia severa   | 3 | Mi miedo me impide que haga cosas importantes en mi vida. (ejemplo, acudir a citas médicas importantes, trabajo, cuidado de mis hijos). |
| Interferencia extrema  | 4 | Mi miedo me impide que haga muchas actividades importantes. Mi miedo causa serios problemas en mi vida.                                 |

| ESFERA DE LA VIDA                                                                        | INTERFERENCIA |      |          |        |         |
|------------------------------------------------------------------------------------------|---------------|------|----------|--------|---------|
|                                                                                          | Ninguna       | Leve | Moderada | Severa | Extrema |
| 1. En la relación con mi pareja o marido.                                                | 0             | 1    | 2        | 3      | 4       |
| 2. En la relación con mi familia.                                                        | 0             | 1    | 2        | 3      | 4       |
| 3. En otras relaciones de mi vida                                                        | 0             | 1    | 2        | 3      | 4       |
| 4. En la relación con los profesionales sanitarios encargados del control de mi embarazo | 0             | 1    | 2        | 3      | 4       |
| 5. En mi vida laboral                                                                    | 0             | 1    | 2        | 3      | 4       |
| 6. En mis actividades de ocio                                                            | 0             | 1    | 2        | 3      | 4       |
| 7. En la preparación para la llegada de mi bebé                                          | 0             | 1    | 2        | 3      | 4       |
| 8. Otros (especifica): _____                                                             | 0             | 1    | 2        | 3      | 4       |

## **INSTRUCCIONES DE PUNTUACIÓN CFQ-E PRIMERA VERSIÓN**

**CFQ-e PUNTUACIÓN TOTAL:** Sumar la puntuación de los 40 ítems

**Puntuación en las Subescalas:** Para cada una de las nueve subescalas enumeradas a continuación, sume los elementos de la subescala. Para crear la puntuación media (para poder comparar entre subescalas), divida la puntuación de la subescala por el número de elementos de la misma.

### **SUBESCALA MIEDO A LA PÉRDIDA DE PLACER/ATRACTIVO SEXUAL**

- 12-Que tu vagina se estire por tener un parto vaginal
- 13-Disfrutar menos de las relaciones sexuales por el estiramiento de la vagina a causa del parto vaginal
- 15-Que tu cuerpo sea menos atractivo tras el parto
- 24-Que tu vagina se vea menos atractiva tras un parto vaginal
- 26-Disfrutar menos de las relaciones sexuales por sentir dolor o molestias tras el parto
- 27-Que tu pareja disfrute menos de las relaciones sexuales después del parto por el estiramiento de tu vagina tras el parto

### **SUBESCALA MIEDO AL DOLOR DE UN PARTO VAGINAL**

- 30-Sentir dolor durante el parto
- 31-Tener un parto vaginal
- 34-Sentir dolor mientras empujas al bebe
- 35-Sentir dolor durante un parto vía vaginal
- 37-Sentir dolor durante las contracciones

### **SUBESCALA MIEDO A LAS INTERVENCIONES MÉDICAS**

- 1-Que te hagan daño por una asistencia médica incompetente
- 4-Recibir anestesia general
- 5-Que te administren inyecciones
- 22-Que te administren la epidural
- 25-Que te queden cicatrices tras la cesárea
- 38-Que te sonden (un tubo que se inserta en la uretra para recoger la orina)
- 39-Sentir dolor durante una cesárea

### **SUBESCALA MIEDO A SENTIRSE AVERGONZADA**

- 7 Que otras personas te vean desnuda durante el parto
- 14-Perder el control de tus emociones frente a otras personas (ser maleducada, gritar) durante el parto
- 21-Que otras personas te vean orinar durante el parto
- 23-Sentirte observada por desconocidos durante el parto
- 32-Que otras personas te vean defecar durante el parto

#### **SUBESCALA MIEDO A DAÑOS AL BEBÉ**

- 6-Que dañen o perjudiquen al bebe como consecuencia del parto
- 9-Que el bebe sufra algún daño durante el parto
- 10-Que dañen al bebe en una intervención médica durante el parto (ej, ventosa, anestesia, fórceps ...)

#### **SUBESCALA MIEDO A LA CESÁREA**

- 33-No poder tener un parto vaginal a pesar de ser lo que prefieres
- 36-Tener una cesárea
- 40-No poder tener el tipo de parto que te gustaría (por ejemplo vaginal o cesárea)

#### **SUBESCALA MIEDO A QUE LA MADRE O EL BEBE SE MUERAN**

- 3-Morir durante el parto
- 16-Que el bebe se asfixie durante el parto
- 20-Que el bebe muera durante el parto

#### **SUBESCALA MIEDO A RECIBIR MEDICACIÓN INSUFICIENTE PARA EL DOLOR**

- 11-Que no te hagan una cesárea cuando es lo que tú quieres
- 18-No recibir la medicación para el dolor que necesitas
- 29-Que no te pongan la epidural durante el parto en el caso de quererla o necesitarla

#### **SUBESCALA MIEDO AL DAÑO CORPORAL POR UN PARTO VAGINAL**

- 2-Sufrir un desgarro o daño rectal como consecuencia del parto
- 8-Sufrir un desgarro vaginal durante el parto
- 17-Necesitar un fórceps o ventosa
- 19-Que te realicen una episiotomía (que te realicen un corte en tu vagina)
- 28-Necesitar puntos de sutura tras el parto
