# Supplementary material for: Validation and Psychometric Properties of the Spanish Version of the Fear of Childbirth Questionnaire (CFQ-e)
Source: MDPI journal article supplement (doi:10.3390/jcm11071843), 2022-03-26
Supplement: s1 [file s1]

Supplementary Table S8. Root Mean Square Discrepancy (RMSD) between rotated loading matrix and target matrix

|        | RMSD  | 95% Confidence intervals |        |
|--------|-------|--------------------------|--------|
| ITEM1  | 0.084 | (0.014                   | 0.141) |
| ITEM2  | 0.174 | (0.109                   | 0.230) |
| ITEM3  | 0.140 | (0.060                   | 0.212) |
| ITEM4  | 0.137 | (0.046                   | 0.199) |
| ITEM5  | 0.037 | (0.010                   | 0.042) |
| ITEM6  | 0.054 | (0.022                   | 0.077) |
| ITEM7  | 0.086 | (0.009                   | 0.166) |
| ITEM8  | 0.192 | (0.139                   | 0.226) |
| ITEM9  | 0.053 | (0.014                   | 0.097) |
| ITEM10 | 0.054 | (0.010                   | 0.097) |
| ITEM12 | 0.139 | (0.057                   | 0.223) |
| ITEM13 | 0.108 | (0.036                   | 0.195) |
| ITEM15 | 0.042 | (0.003                   | 0.070) |
| ITEM16 | 0.062 | (0.026                   | 0.090) |
| ITEM17 | 0.111 | (0.041                   | 0.165) |
| ITEM18 | 0.132 | (0.032                   | 0.241) |
| ITEM20 | 0.022 | (0.003                   | 0.030) |
| ITEM21 | 0.072 | (0.013                   | 0.125) |
| ITEM22 | 0.050 | (0.016                   | 0.079) |
| ITEM23 | 0.125 | (0.021                   | 0.247) |
| ITEM24 | 0.067 | (0.027                   | 0.095) |
| ITEM25 | 0.067 | (0.004                   | 0.123) |
| ITEM26 | 0.101 | (0.048                   | 0.139) |
| ITEM27 | 0.100 | (0.032                   | 0.153) |
| ITEM28 | 0.185 | (0.102                   | 0.243) |

|        |       |        |        |
|--------|-------|--------|--------|
| ITEM29 | 0.151 | (0.090 | 0.212) |
| ITEM30 | 0.054 | (0.009 | 0.093) |
| ITEM31 | 0.130 | (0.028 | 0.224) |
| ITEM32 | 0.101 | (0.027 | 0.186) |
| ITEM33 | 0.088 | (0.022 | 0.201) |
| ITEM34 | 0.078 | (0.033 | 0.122) |
| ITEM35 | 0.077 | (0.025 | 0.139) |
| ITEM36 | 0.083 | (0.008 | 0.126) |
| ITEM37 | 0.087 | (0.017 | 0.149) |
| ITEM38 | 0.131 | (0.065 | 0.215) |
| ITEM39 | 0.131 | (0.064 | 0.204) |
| ITEM40 | 0.059 | (0.008 | 0.088) |
