# Supplementary material for: Validation and Psychometric Properties of the Spanish Version of the Fear of Childbirth Questionnaire (CFQ-e)
Source: MDPI journal article supplement (doi:10.3390/jcm11071843), 2022-03-26
Supplement: s1 [file s1]

Supplementary Material S7. Table of data congruence indices with the semi-specified four-factor-40 item model based on the results of the first sample's EFA.

| Variable      | Congruence Index | 95% Confidence intervals |               |
|---------------|------------------|--------------------------|---------------|
| ITEM1         | 0.969            | (0.905                   | 0.998)        |
| ITEM2         | 0.834            | (0.708                   | 0.938)        |
| ITEM3         | 0.948            | (0.887                   | 0.989)        |
| ITEM4         | 0.881            | (0.618                   | 0.986)        |
| ITEM5         | 0.985            | (0.940                   | 0.999)        |
| ITEM6         | 0.993            | (0.987                   | 0.998)        |
| ITEM7         | 0.975            | (0.914                   | 0.998)        |
| ITEM8         | 0.729            | (0.565                   | 0.871)        |
| ITEM9         | 0.995            | (0.988                   | 0.999)        |
| ITEM10        | 0.995            | (0.985                   | 1.000)        |
| <b>ITEM11</b> | <b>0.613</b>     | <b>(0.203</b>            | <b>0.895)</b> |
| ITEM12        | 0.921            | (0.783                   | 0.988)        |
| ITEM13        | 0.978            | (0.911                   | 0.997)        |
| <b>ITEM14</b> | <b>0.705</b>     | <b>(0.410</b>            | <b>0.963)</b> |
| ITEM15        | 0.994            | (0.984                   | 1.000)        |
| ITEM16        | 0.991            | (0.982                   | 0.999)        |
| ITEM17        | 0.936            | (0.835                   | 0.990)        |
| ITEM18        | 0.951            | (0.849                   | 0.994)        |
| <b>ITEM19</b> | <b>0.208</b>     | <b>(-0.165</b>           | <b>0.531)</b> |
| ITEM20        | 0.997            | (0.995                   | 1.000)        |
| ITEM21        | 0.972            | (0.901                   | 1.000)        |
| ITEM22        | 0.996            | (0.994                   | 1.000)        |
| ITEM23        | 0.839            | (0.617                   | 0.961)        |
| ITEM24        | 0.988            | (0.978                   | 0.997)        |
| ITEM25        | 0.980            | (0.957                   | 1.000)        |
| ITEM26        | 0.976            | (0.952                   | 0.995)        |
| ITEM27        | 0.978            | (0.942                   | 0.999)        |
| ITEM28        | 0.693            | (0.437                   | 0.890)        |
| ITEM29        | 0.883            | (0.718                   | 0.975)        |
| ITEM30        | 0.994            | (0.982                   | 1.000)        |
| ITEM31        | 0.916            | (0.731                   | 0.995)        |
| ITEM32        | 0.968            | (0.904                   | 0.998)        |
| ITEM33        | 0.986            | (0.915                   | 0.999)        |
| ITEM34        | 0.986            | (0.967                   | 0.998)        |
| ITEM35        | 0.987            | (0.962                   | 0.997)        |
| ITEM36        | 0.986            | (0.961                   | 0.999)        |
| ITEM37        | 0.980            | (0.950                   | 0.998)        |
| ITEM38        | 0.917            | (0.817                   | 0.988)        |
| ITEM39        | 0.911            | (0.768                   | 0.995)        |
| ITEM40        | 0.988            | (0.970                   | 0.998)        |
