# Supplementary material for: Validation and Psychometric Properties of the Spanish Version of the Fear of Childbirth Questionnaire (CFQ-e)
Source: MDPI journal article supplement (doi:10.3390/jcm11071843), 2022-03-26
Supplement: s1 [file s1]

| How fear affects/Sphere of life                                                                                | Floor<br>No interference <sup>a</sup><br>n(%) | Ceiling<br>Extreme interference <sup>a</sup><br>n(%) | M(SD)          |
|----------------------------------------------------------------------------------------------------------------|-----------------------------------------------|------------------------------------------------------|----------------|
| 1.With my relationship with my partner/spouse.                                                                 | 327<br>(58.7%)                                | 7<br>(1.3%)                                          | 0.64<br>(0.90) |
| 2.With my relationship with my family members                                                                  | 346<br>(62.1%)                                | 5<br>(0.9%)                                          | 0.60<br>(0.90) |
| 3.With other relationships in my life                                                                          | 330<br>(59.2%)                                | 2<br>(0.4%)                                          | 0.59<br>(0.82) |
| 4.With my relationships with my prenatal caregivers                                                            | 289<br>(51.9%)                                | 6<br>(1.1%)                                          | 0.72<br>(0.89) |
| 5.With my work life                                                                                            | 277<br>(49.7%)                                | 9<br>(1.6%)                                          | 0.77<br>(0.95) |
| 6.With my leisure activities                                                                                   | 302<br>(54.2%)                                | 3<br>(0.5%)                                          | 0.68<br>(0.87) |
| 7.With getting ready for the new baby                                                                          | 240<br>(43.1%)                                | 17<br>(3.1%)                                         | 0.95<br>(1.06) |
| a= Only upper (ceiling) or lower (floor) responses are displayed per item.<br>M = Mean/SD = Standard Deviation |                                               |                                                      |                |

Supplementary Table S4. Floor and ceiling scores, Means and Standard Deviation for each item in the Interference Scale(n=557).
