# Supplementary material for: Validation and Psychometric Properties of the Spanish Version of the Fear of Childbirth Questionnaire (CFQ-e)
Source: MDPI journal article supplement (doi:10.3390/jcm11071843), 2022-03-26
Supplement: s1 [file s1]

**Supplementary Table S6** Model factor loadings (after rotation) obtained from 4 factors-40 items from the first version of the CFQ-S in the second sample (n=278)

|                                                                                                                       | F1<br>Fears relating to sexual<br>aspects and<br>embarrassment | F2<br>Fear of<br>Medical<br>Interventions | F3<br>Fear<br>of pain | F4<br>Fear of harm<br>to self and<br>dying |
|-----------------------------------------------------------------------------------------------------------------------|----------------------------------------------------------------|-------------------------------------------|-----------------------|--------------------------------------------|
| Item 1-Being harmed by incompetent medical care                                                                       | 0.010                                                          | 0.146                                     | -0.002                | <b>0.571</b>                               |
| Item2-Tears or rectal damage resulting from childbirth                                                                | 0.164                                                          | 0.013                                     | 0.238                 | <b>0.437</b>                               |
| Item3-Dying during labour                                                                                             | -0.234                                                         | 0.034                                     | 0.113                 | <b>0.784</b>                               |
| Item4-Receiving general anaesthesia                                                                                   | -0.085                                                         | <b>0.463</b>                              | -0.018                | 0.233                                      |
| Item5-Receiving injections                                                                                            | 0.001                                                          | <b>0.519</b>                              | 0.064                 | 0.065                                      |
| Item6-Harm to self or to my baby during labour and birth                                                              | -0.086                                                         | -0.036                                    | -0.061                | <b>0.913</b>                               |
| Item7- Being seen naked during labour                                                                                 | <b>0.577</b>                                                   | 0.061                                     | -0.063                | -0.097                                     |
| Item8-A vaginal tear during labour                                                                                    | 0.248                                                          | 0.089                                     | 0.197                 | <b>0.350</b>                               |
| Item9-My baby will be harmed during labour                                                                            | 0.004                                                          | -0.027                                    | -0.090                | <b>0.952</b>                               |
| Item10- My baby will be harmed during a medical intervention during labour (e.g., vacuum, anaesthesia, forceps, etc.) | -0.005                                                         | 0.011                                     | -0.089                | <b>0.907</b>                               |
| Item11-Not having a C-section despite desiring one                                                                    | 0.196                                                          | -0.139                                    | 0.265                 | 0.244                                      |
| Item12-My vagina stretching after a vaginal birth                                                                     | <b>0.623</b>                                                   | -0.085                                    | 0.250                 | 0.014                                      |
| Item13-Loss of sexual pleasure because of stretched vagina after birth                                                | <b>0.854</b>                                                   | -0.164                                    | 0.014                 | 0.077                                      |
| Item14-Losing self-control in front of other people (being rude, screaming) during labour                             | 0.150                                                          | 0.131                                     | 0.066                 | 0.208                                      |
| Item15-A less attractive body after childbirth                                                                        | <b>0.690</b>                                                   | 0.017                                     | -0.069                | 0.026                                      |
| Item16-My baby will suffocate during labour                                                                           | -0.099                                                         | -0.010                                    | -0.078                | <b>0.943</b>                               |
| Item17-Need forceps or vacuum delivery                                                                                | 0.038                                                          | 0.178                                     | -0.006                | <b>0.483</b>                               |
| Item18-Not receiving adequate pain relief                                                                             | 0.105                                                          | -0.162                                    | 0.396                 | <b>0.475</b>                               |
| Item19-Having an episiotomy (a cut made to the vagina)                                                                | <b>0.311</b>                                                   | 0.257                                     | 0.096                 | 0.198                                      |
| Item20-My baby dying during labour                                                                                    | -0.047                                                         | -0.008                                    | -0.021                | <b>0.724</b>                               |
| Item21-Being seen urinating during labour                                                                             | <b>0.571</b>                                                   | 0.084                                     | 0.043                 | -0.100                                     |
| Item22-Having an epidural                                                                                             | -0.041                                                         | <b>0.668</b>                              | -0.040                | -0.005                                     |
| Item23-Feeling observed by strangers during labour                                                                    | <b>0.657</b>                                                   | 0.159                                     | -0.050                | -0.115                                     |
| Item24-Having a less attractive vagina after a vaginal birth                                                          | <b>0.897</b>                                                   | -0.014                                    | -0.037                | -0.132                                     |
| Item25-Having scars after a C-section                                                                                 | 0.368                                                          | <b>0.401</b>                              | -0.004                | -0.108                                     |
| Item26-Loss of sexual pleasure because of pain or discomfort after childbirth                                         | <b>0.685</b>                                                   | -0.005                                    | -0.011                | 0.152                                      |
| Item27-My partner loses sexual pleasure after childbirth because of my stretched vagina after childbirth.             | <b>0.762</b>                                                   | -0.044                                    | -0.105                | 0.113                                      |
| Item28-Needing stitches after childbirth                                                                              | 0.308                                                          | <b>0.442</b>                              | 0.095                 | -0.027                                     |
| Item29-Not receiving an epidural during labour despite desiring or needing it                                         | 0.089                                                          | -0.035                                    | <b>0.465</b>          | 0.229                                      |
| Item30-Feeling pain during labour                                                                                     | 0.073                                                          | -0.025                                    | <b>0.862</b>          | 0.053                                      |
| Item31-Having a vaginal birth                                                                                         | 0.216                                                          | -0.063                                    | <b>0.512</b>          | 0.007                                      |
| Item32-Being seen defecating during labour                                                                            | <b>0.713</b>                                                   | 0.138                                     | -0.039                | -0.118                                     |
| Item33-Not proceeding with a vaginal birth preferring one                                                             | 0.049                                                          | <b>0.768</b>                              | -0.121                | -0.003                                     |
| Item34-Feeling pain while pushing                                                                                     | -0.092                                                         | -0.011                                    | <b>0.970</b>          | -0.135                                     |
| Item35-Feeling pain during a vaginal birth                                                                            | -0.127                                                         | 0.035                                     | <b>0.980</b>          | -0.093                                     |
| Item36-Having a C-section                                                                                             | -0.122                                                         | <b>0.925</b>                              | -0.022                | -0.094                                     |
| Item37-Feeling pain during contractions                                                                               | -0.105                                                         | 0.105                                     | <b>0.864</b>          | -0.089                                     |

|                                                                                        |        |              |       |       |
|----------------------------------------------------------------------------------------|--------|--------------|-------|-------|
| Item38-Having a catheter (a tube inserted in the bladder to collect urine)             | -0.054 | <b>0.527</b> | 0.229 | 0.083 |
| Item39-Feeling pain during a C-section                                                 | -0.056 | <b>0.540</b> | 0.179 | 0.157 |
| Item40-Not proceeding with the type of childbirth I chose (e.g., vaginal or C-section) | 0.023  | <b>0.633</b> | 0.027 | 0.093 |
