# Supplementary material for: Validation and Psychometric Properties of the Spanish Version of the Fear of Childbirth Questionnaire (CFQ-e)
Source: MDPI journal article supplement (doi:10.3390/jcm11071843), 2022-03-26
Supplement: s1 [file s1]

| Nº Item | Number of experts who score 3 or 4 points | I-CVI <sup>a</sup> | Pc <sup>b</sup> | K* <sup>c</sup> | Evaluation <sup>d</sup> |
|---------|-------------------------------------------|--------------------|-----------------|-----------------|-------------------------|
| 1       | 10                                        | 1,00               | 0,001           | 1,00            | Excelent                |
| 2       | 9                                         | 0,90               | 0,010           | 0,90            | Excelent                |
| 3       | 9                                         | 0,90               | 0,010           | 0,90            | Excelent                |
| 4       | 7                                         | 0,70               | 0,117           | 0,66            | Good                    |
| 5       | 4                                         | 0,40               | 0,205           | 0,25            | Poor                    |
| 6       | 10                                        | 1,00               | 0,001           | 1,00            | Excelent                |
| 7       | 7                                         | 0,70               | 0,117           | 0,66            | Good                    |
| 8       | 9                                         | 0,90               | 0,010           | 0,90            | Excelent                |
| 9       | 10                                        | 1,00               | 0,001           | 1,00            | Excelent                |
| 10      | 10                                        | 1,00               | 0,001           | 1,00            | Excelent                |
| 11      | 7                                         | 0,70               | 0,117           | 0,66            | Good                    |
| 12      | 2                                         | 0,20               | 0,044           | 0,16            | Poor                    |
| 13      | 4                                         | 0,40               | 0,205           | 0,25            | Poor                    |
| 14      | 6                                         | 0,60               | 0,205           | 0,50            | Fair                    |
| 15      | 7                                         | 0,70               | 0,117           | 0,66            | Good                    |
| 16      | 10                                        | 1,00               | 0,001           | 1,00            | Excelent                |
| 17      | 9                                         | 0,90               | 0,010           | 0,90            | Excelent                |
| 18      | 10                                        | 1,00               | 0,001           | 1,00            | Excelent                |
| 19      | 9                                         | 0,90               | 0,010           | 0,90            | Excelent                |
| 20      | 10                                        | 1,00               | 0,001           | 1,00            | Excelent                |
| 21      | 6                                         | 0,60               | 0,205           | 0,50            | Fair                    |
| 22      | 4                                         | 0,40               | 0,205           | 0,25            | Poor                    |
| 23      | 7                                         | 0,70               | 0,117           | 0,66            | Good                    |
| 24      | 6                                         | 0,60               | 0,205           | 0,50            | Fair                    |
| 25      | 7                                         | 0,70               | 0,117           | 0,66            | Good                    |
| 26      | 9                                         | 0,90               | 0,010           | 0,90            | Excelent                |
| 27      | 7                                         | 0,70               | 0,117           | 0,66            | Good                    |
| 28      | 7                                         | 0,70               | 0,117           | 0,66            | Good                    |
| 29      | 10                                        | 1,00               | 0,001           | 1,00            | Excelent                |
| 30      | 9                                         | 0,90               | 0,010           | 0,90            | Excelent                |

|                                                                                                                                                                                                                                                                                                                                                                                                                                                                   |    |      |       |      |          |
|-------------------------------------------------------------------------------------------------------------------------------------------------------------------------------------------------------------------------------------------------------------------------------------------------------------------------------------------------------------------------------------------------------------------------------------------------------------------|----|------|-------|------|----------|
| 31                                                                                                                                                                                                                                                                                                                                                                                                                                                                | 7  | 0,70 | 0,117 | 0,66 | Good     |
| 32                                                                                                                                                                                                                                                                                                                                                                                                                                                                | 6  | 0,60 | 0,205 | 0,50 | Fair     |
| 33                                                                                                                                                                                                                                                                                                                                                                                                                                                                | 10 | 1,00 | 0,001 | 1,00 | Excelent |
| 34                                                                                                                                                                                                                                                                                                                                                                                                                                                                | 9  | 0,90 | 0,010 | 0,90 | Excelent |
| 35                                                                                                                                                                                                                                                                                                                                                                                                                                                                | 9  | 0,90 | 0,010 | 0,90 | Excelent |
| 36                                                                                                                                                                                                                                                                                                                                                                                                                                                                | 10 | 1,00 | 0,001 | 1,00 | Excelent |
| 37                                                                                                                                                                                                                                                                                                                                                                                                                                                                | 7  | 0,70 | 0,117 | 0,66 | Good     |
| 38                                                                                                                                                                                                                                                                                                                                                                                                                                                                | 4  | 0,40 | 0,205 | 0,25 | Poor     |
| 39                                                                                                                                                                                                                                                                                                                                                                                                                                                                | 8  | 0,80 | 0,044 | 0,79 | Excelent |
| 40                                                                                                                                                                                                                                                                                                                                                                                                                                                                | 10 | 1,00 | 0,001 | 1,00 | Excelent |
| <sup>a</sup> I-CVI = Item-level content validity index<br><sup>b</sup> Pc: Probability of chance agreement $Pc = [N! / (A!(N-A)!)] \cdot 0.5^N$ . where N = n° expert and A = n of agreement with good relevance<br><sup>c</sup> K*: Modified kappa coefficient designating $K^* = (I-CVI - Pc) / (1 - Pc)$ .<br><sup>d</sup> Evaluation criteria for kappa. K*: Poor $K^* < 0,40$ ; Fair $K^* = 0,40-0,599$ ; Good $K^* = 0,60-0,749$ ; Excelent: $K^* > 0,75$ . |    |      |       |      |          |

Supplementary Table S3. I-CVI scores for each ítem of CFQ-e.
