# Supplementary material for: Validation and Psychometric Properties of the Spanish Version of the Fear of Childbirth Questionnaire (CFQ-e)
Source: MDPI journal article supplement (doi:10.3390/jcm11071843), 2022-03-26
Supplement: s1 [file s1]

Supplementary Table S9. Final version of the CFQ-e (English and Spanish version)

| <b>Subscales and items for the final CFQ-e Model (4 subscales-37 items)</b>                                             |
|-------------------------------------------------------------------------------------------------------------------------|
| <i>Fear relating to sexual aspects and embarrassment Subscale</i>                                                       |
| 12- My vagina stretching after a vaginal birth                                                                          |
| 13- Loss of sexual pleasure because of stretched vagina after childbirth                                                |
| 15- A less attractive body after childbirth                                                                             |
| 24- A less attractive vagina after vaginal childbirth                                                                   |
| 26- Loss of sexual pleasure because of pain or discomfort after childbirth                                              |
| 27- My partner loses sexual pleasure after childbirth because of my stretched vagina after childbirth.                  |
| 7 Being seen naked during labour                                                                                        |
| 21- Being seen urinating during labour                                                                                  |
| 23- Feeling observed by strangers during labour                                                                         |
| 32- Being seen defecating during labour                                                                                 |
| <i>Fear of Medical Interventions Subscale</i>                                                                           |
| 4- Receiving general anaesthesia                                                                                        |
| 5- Receiving injections                                                                                                 |
| 22- Having an epidural                                                                                                  |
| 28- Needing stitches after childbirth                                                                                   |
| 33- Not proceeding with a vaginal birth despite preferring one                                                          |
| 36- Having a C-section                                                                                                  |
| 38- Having a catheter (a tube that is inserted in the bladder to collect urine)                                         |
| 39- Feeling pain during a C-section                                                                                     |
| 40- Not proceeding with the type of childbirth I chose (e.g., vaginal or C-section)                                     |
| 25- Having scars after a C-section                                                                                      |
| <i>Fear of pain Subscale</i>                                                                                            |
| 29- Not receiving an epidural during labour despite desiring or needing one                                             |
| 30- Feeling pain during labour                                                                                          |
| 31- Having a vaginal childbirth                                                                                         |
| 34- Feeling pain while pushing                                                                                          |
| 35- Feeling pain during a vaginal birth                                                                                 |
| 37- Feeling pain during contractions                                                                                    |
| 18- Not receiving adequate pain relief                                                                                  |
| <i>Fear of harm and dying Subscale</i>                                                                                  |
| 1- Being harmed by incompetent medical care                                                                             |
| 2- Tears or rectal damage resulting from childbirth                                                                     |
| 3- Dying during labour                                                                                                  |
| 6- They cause injury or harm to my baby due to the delivery                                                             |
| 8- A vaginal tear during labour                                                                                         |
| 9- My baby will be harmed during labour                                                                                 |
| 10- They harm the baby in the course of a medical intervention during labour (e.g., vacuum, anaesthesia, forceps, etc.) |
| 16- My baby suffocating during labour                                                                                   |
| 17- Needing a forceps or vacuum                                                                                         |
| 20- My baby dying during labour                                                                                         |
| <i>Items removed from the final version of the CFQ-e with respect to the original CFQ version</i>                       |
| 11- Not having a C-section despite desiring one                                                                         |
| 14- Losing self-control in front of other people (being rude, screaming) during labour                                  |
| 19- Have an episiotomy performed (have a cut made in your vagina)                                                       |

| <b>Subescalas e ítems para el Modelo final del CFQ-e</b>                                                                    |
|-----------------------------------------------------------------------------------------------------------------------------|
| <i>Subescala Miedo respecto aspectos sexuales y vergüenza</i>                                                               |
| 12-Que tu vagina se estire por tener un parto vaginal                                                                       |
| 13-Disfrutar menos de las relaciones sexuales por el estiramiento de la vagina a causa del parto vaginal                    |
| 15-Que tu cuerpo sea menos atractivo tras el parto                                                                          |
| 24-Que tu vagina se vea menos atractiva tras un parto vaginal                                                               |
| 26-Disfrutar menos de las relaciones sexuales por sentir dolor o molestias tras el parto                                    |
| 27-Que tu pareja disfrute menos de las relaciones sexuales después del parto por el estiramiento de tu vagina tras el parto |
| 7-Que otras personas te vean desnuda durante el parto                                                                       |
| 21-Que otras personas te vean orinar durante el parto                                                                       |
| 23-Sentirte observada por desconocidos durante el parto                                                                     |
| 32-Que otras personas te vean defecar durante el parto                                                                      |
| <i>Subescala Miedo a Procedimientos médicos</i>                                                                             |
| 4-Recibir anestesia general                                                                                                 |
| 5-Que te administren inyecciones                                                                                            |
| 22-Que te administren la epidural                                                                                           |
| 28-Necesitar puntos de sutura tras el parto                                                                                 |
| 33-No poder tener un parto vaginal a pesar de ser lo que prefieres                                                          |
| 36-Tener una cesárea                                                                                                        |
| 38-Que te sonden (un tubo que se inserta en la uretra para recoger la orina)                                                |
| 39-Sentir dolor durante una cesárea                                                                                         |
| 40-No poder tener el tipo de parto que te gustaría (por ejemplo vaginal o cesárea)                                          |
| 25-Que te queden cicatrices tras la cesárea                                                                                 |
| <i>Subescala Miedo al dolor</i>                                                                                             |
| 29-Que no te pongan la epidural durante el parto en el caso de quererla o necesitarla                                       |
| 30-Sentir dolor durante el parto                                                                                            |
| 31-Tener un parto vaginal                                                                                                   |
| 34-Sentir dolor mientras empujas al bebé                                                                                    |
| 35-Sentir dolor durante un parto vía vaginal                                                                                |
| 37-Sentir dolor durante las contracciones                                                                                   |
| 18-No recibir la medicación para el dolor que necesitas                                                                     |
| <i>Subescala Miedo al daño corporal y a la muerte</i>                                                                       |
| 1-Que te hagan daño por una asistencia médica incompetente                                                                  |
| 2-Sufrir un desgarro o daño rectal como consecuencia del parto                                                              |
| 3-Morir durante el parto                                                                                                    |
| 6-Que dañen o perjudiquen al bebé como consecuencia del parto                                                               |
| 8-Sufrir un desgarro vaginal durante el parto                                                                               |
| 9-Que el bebé sufra algún daño durante el parto                                                                             |
| 10-Que dañen al bebé en una intervención médica durante el parto (ej, ventosa, anestesia, fórceps ...)                      |
| 16-Que el bebé se asfixie durante el parto                                                                                  |
| 17-Necesitar un fórceps o ventosa                                                                                           |
| 20-Que el bebé muera durante el parto                                                                                       |
| <i>Ítems eliminados respecto a la versión original del CFQ</i>                                                              |
| 11-Que no te hagan una cesárea cuando es lo que tú quieres                                                                  |
| 14-Perder el control de tus emociones frente a otras personas (ser maleducada, gritar) durante el parto                     |
| 19-Que te realicen una episiotomía (que te realicen un corte en tu vagina)                                                  |
