# Supplementary material for: Validation and Psychometric Properties of the Spanish Version of the Fear of Childbirth Questionnaire (CFQ-e)
Source: J Clin Med. 2022 Mar 26;11(7):1843. doi: 10.3390/jcm11071843 (PMC8999905; doi:10.3390/jcm11071843)
Supplement: Supplementary file 1 [file jcm-11-01843-s001.zip]

Archive with 10 entries (10 files):
- TABLE S1. First Version of CFQ-e (spanish version).pdf
- TABLE S10. CFQ-e Reliability scores.pdf
- TABLE S2. Profile and CVI-E experts.pdf
- TABLE S3. I-CVI 40 items CFQ-e.pdf
- TABLE S4. Interference Scale.pdf
- TABLE S5. Factor loadings  4 factors 40 items.pdf
- TABLE S6  Factor loadings CFA 4factor 40 items.pdf
- TABLE S7 Congruence indices 4-factor-40 item EFA.pdf
- TABLE S8. Root Mean Square Discrepancy (RMSD).pdf
- TABLE S9 Final version CFQ-e 4 subscales-37 items SPANISH ENGLISH VERSION.pdf
